# Supplementary material
Source: PubMed Central journal article supplement (PMC2992268)

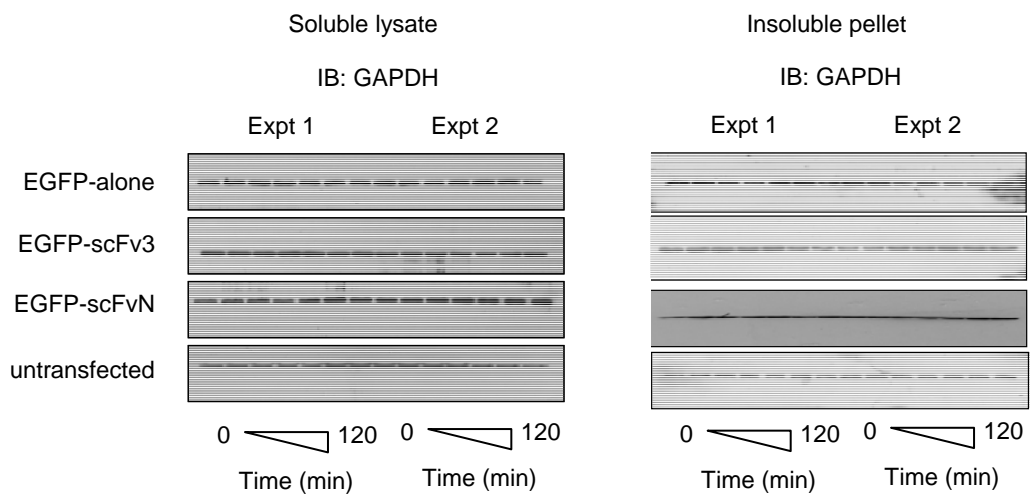

GAPDP control for the data given in Figure 7b and d

Supplement: supp_M110.149476_jbc.M110.149476-1.pdf [file supp_M110.149476_jbc.M110.149476-1.pdf]
